# Supplementary material for: Role of Sesamia nonagrioides and Ostrinia nubilalis as Vectors of Fusarium spp. and Contribution of Corn Borer-Resistant Bt Maize to Mycotoxin Reduction
Source: MDPI journal article supplement (doi:10.3390/toxins13110780), 2021-11-04
Supplement: s1 [file s1]

# Supplementary Materials: Role of *Sesamia nonagrioides* and *Ostrinia nubilalis* as Vectors of *Fusarium* spp. and Contribution of Corn Borer-Resistant Bt Maize to Mycotoxin Reduction

María Arias-Martín, Miriam Haidukowski, Gema P. Farinós and Belén Patiño

**Table S1.** Mycotoxin concentration ( $\mu\text{g}/\text{kg}$ ) of samples of corn borer-damaged non-Bt maize ears and undamaged Bt maize ears collected in Extremadura in 2011.

| Sample <sup>a</sup> |       | Mycotoxin <sup>b</sup> |       |       |      |                 |                 |                                   |
|---------------------|-------|------------------------|-------|-------|------|-----------------|-----------------|-----------------------------------|
|                     |       | DON                    | T-2   | HT-2  | ZEA  | FB <sub>1</sub> | FB <sub>2</sub> | FB <sub>1</sub> + FB <sub>2</sub> |
| <b>non-Bt maize</b> | RL P1 | n.d.                   | n.d.  | n.d.  | n.d. | 536             | 49              | 585                               |
|                     | RL P2 | n.d.                   | n.d.  | n.d.  | n.d. | 378             | 65              | 443                               |
|                     | RL P3 | n.d.                   | n.d.  | n.d.  | n.d. | 2,309           | 551             | 2,860                             |
|                     | RL P4 | n.d.                   | n.d.  | n.d.  | n.d. | 33,788          | 13,427          | 47,215                            |
|                     | RL P5 | n.d.                   | n.d.  | n.d.  | n.d. | 24              | n.d.            | 24                                |
|                     | DB P1 | n.d.                   | n.d.  | n.d.  | n.d. | 25              | n.d.            | 25                                |
|                     | DB P2 | n.d.                   | n.d.  | n.d.  | n.d. | 126             | 128             | 254                               |
|                     | DB P3 | n.d.                   | n.d.  | n.d.  | n.d. | 27              | n.d.            | 27                                |
|                     | DB P4 | n.d.                   | n.d.  | n.d.  | n.d. | 34,043          | 9,958           | 44,001                            |
|                     | DB P5 | n.d.                   | n.d.  | n.d.  | n.d. | 14,281          | 7,027           | 21,308                            |
|                     | MA P1 | n.d.                   | n.d.  | n.d.  | n.d. | n.d.            | n.d.            | n.d.                              |
|                     | MA P2 | n.d.                   | n.d.  | n.d.  | n.d. | 133             | 37              | 170                               |
|                     | MA P3 | n.d.                   | n.d.  | n.d.  | n.d. | 16              | n.d.            | 16                                |
|                     | MA P4 | n.d.                   | n.d.  | n.d.  | n.d. | n.d.            | n.d.            | n.d.                              |
|                     | MA P5 | n.d.                   | n.d.  | n.d.  | n.d. | n.d.            | n.d.            | n.d.                              |
|                     | MH P1 | n.d.                   | n.d.  | 33    | n.d. | 111             | 23              | 134                               |
|                     | MH P2 | n.d.                   | n.d.  | n.d.  | n.d. | 83              | 20              | 103                               |
|                     | MH P3 | 122                    | n.d.  | n.d.  | n.d. | 2,039           | 220             | 2,259                             |
|                     | MH P4 | n.d.                   | n.d.  | n.d.  | n.d. | 108             | 20              | 128                               |
|                     | MH P5 | n.d.                   | 23    | 27    | n.d. | 114             | n.d.            | 114                               |
| <b>Bt maize</b>     | RL P1 | n.d.                   | n.d.  | n.d.  | n.d. | 43              | n.d.            | 43                                |
|                     | RL P2 | n.d.                   | n.d.  | n.d.  | n.d. | 16              | n.d.            | 16                                |
|                     | RL P3 | n.d.                   | n.d.  | n.d.  | n.d. | 23              | n.d.            | 23                                |
|                     | RL P4 | n.d.                   | n.d.  | n.d.  | n.d. | n.d.            | n.d.            | n.d.                              |
|                     | RL P5 | n.d.                   | n.d.  | n.d.  | n.d. | 11              | n.d.            | 11                                |
|                     | DB P1 | n.d.                   | n.d.  | n.d.  | n.d. | n.d.            | n.d.            | n.d.                              |
|                     | DB P2 | n.d.                   | n.d.  | n.d.  | n.d. | n.d.            | n.d.            | n.d.                              |
|                     | DB P3 | n.d.                   | n.d.  | n.d.  | n.d. | 44              | n.d.            | 44                                |
|                     | DB P4 | n.d.                   | n.d.  | n.d.  | n.d. | n.d.            | n.d.            | n.d.                              |
|                     | DB P5 | n.d.                   | n.d.  | n.d.  | n.d. | n.d.            | n.d.            | n.d.                              |
|                     | MA P1 | n.d.                   | 3,491 | 6,337 | n.d. | 36              | n.d.            | 36                                |
|                     | MA P2 | n.d.                   | 34    | 48    | n.d. | 22              | n.d.            | 22                                |
|                     | MA P3 | n.d.                   | n.d.  | 25    | n.d. | n.d.            | n.d.            | n.d.                              |
|                     | MA P4 | n.d.                   | n.d.  | n.d.  | n.d. | n.d.            | n.d.            | n.d.                              |
|                     | MA P5 | n.d.                   | n.d.  | n.d.  | n.d. | n.d.            | n.d.            | n.d.                              |
|                     | MH P1 | n.d.                   | n.d.  | n.d.  | n.d. | 13              | n.d.            | 13                                |

|       |      |      |      |      |      |      |      |
|-------|------|------|------|------|------|------|------|
| MH P2 | n.d. | n.d. | n.d. | n.d. | 33   | n.d. | 33   |
| MH P3 | n.d. | n.d. | n.d. | n.d. | 50   | n.d. | 50   |
| MH P4 | n.d. |
| MH P5 | n.d. |

<sup>a</sup> Locations: RL: Riobobos, DB: Don Benito, MA: Madrigalejo, MH: Moheda de Gata; P: sampling point.

<sup>b</sup> DON: deoxynivalenol; ZEA: zearalenone; FB: fumonisins.  
n.d.: not detected (<LOD).

**Table S2.** Mycotoxin concentration (µg/kg) of samples of corn borer-damaged non-Bt maize ears and undamaged Bt maize ears collected in Albacete in 2011.

| Sample <sup>a</sup> |       | Mycotoxin <sup>b</sup> |      |      |      |                 |                 |                                   |
|---------------------|-------|------------------------|------|------|------|-----------------|-----------------|-----------------------------------|
|                     |       | DON                    | T-2  | HT-2 | ZEA  | FB <sub>1</sub> | FB <sub>2</sub> | FB <sub>1</sub> + FB <sub>2</sub> |
| <b>non-Bt maize</b> | MO P1 | n.d.                   | n.d. | n.d. | n.d. | n.d.            | n.d.            | n.d.                              |
|                     | MO P2 | n.d.                   | n.d. | n.d. | n.d. | n.d.            | n.d.            | n.d.                              |
|                     | MO P3 | 282                    | n.d. | n.d. | n.d. | 505             | 75              | 580                               |
|                     | MO P4 | 1,936                  | n.d. | n.d. | 63   | 130,930         | 37,569          | 168,499                           |
|                     | MO P5 | n.d.                   | n.d. | n.d. | n.d. | 123             | 47              | 170                               |
|                     | BA P1 | n.d.                   | n.d. | 11   | n.d. | 75              | n.d.            | 75                                |
|                     | BA P2 | n.d.                   | n.d. | n.d. | n.d. | n.d.            | n.d.            | n.d.                              |
|                     | BA P3 | n.d.                   | n.d. | n.d. | n.d. | 11,180          | 4,236           | 15,416                            |
|                     | BA P4 | n.d.                   | n.d. | n.d. | n.d. | 1,773           | 920             | 2,693                             |
|                     | BA P5 | n.d.                   | n.d. | n.d. | n.d. | 6,129           | 1,629           | 7,758                             |
|                     | SA P1 | n.d.                   | n.d. | n.d. | n.d. | 58              | n.d.            | 58                                |
|                     | SA P2 | n.d.                   | n.d. | n.d. | n.d. | 306             | 226             | 532                               |
|                     | SA P3 | n.d.                   | n.d. | n.d. | n.d. | 2,805           | 1,387           | 4,192                             |
|                     | SA P4 | 540                    | n.d. | n.d. | n.d. | 89              | n.d.            | 89                                |
|                     | SA P5 | n.d.                   | n.d. | 10   | n.d. | n.d.            | n.d.            | n.d.                              |
| <b>Bt maize</b>     | MO P1 | n.d.                   | n.d. | n.d. | n.d. | n.d.            | n.d.            | n.d.                              |
|                     | MO P2 | n.d.                   | 12   | n.d. | n.d. | 14              | n.d.            | 14                                |
|                     | MO P3 | n.d.                   | n.d. | n.d. | n.d. | n.d.            | n.d.            | n.d.                              |
|                     | MO P4 | n.d.                   | n.d. | n.d. | n.d. | 14              | n.d.            | 14                                |
|                     | MO P5 | n.d.                   | n.d. | n.d. | n.d. | n.d.            | n.d.            | n.d.                              |
|                     | BA P1 | n.d.                   | n.d. | n.d. | n.d. | 70              | 32              | 102                               |
|                     | BA P2 | n.d.                   | n.d. | n.d. | n.d. | 127             | 32              | 159                               |
|                     | BA P3 | n.d.                   | n.d. | n.d. | n.d. | 232             | 32              | 264                               |
|                     | BA P4 | n.d.                   | n.d. | n.d. | n.d. | 14              | n.d.            | 14                                |
|                     | BA P5 | n.d.                   | n.d. | n.d. | n.d. | 14              | n.d.            | 14                                |
|                     | SA P1 | n.d.                   | n.d. | n.d. | n.d. | n.d.            | n.d.            | n.d.                              |
|                     | SA P2 | n.d.                   | n.d. | n.d. | n.d. | n.d.            | n.d.            | n.d.                              |
|                     | SA P3 | n.d.                   | n.d. | n.d. | n.d. | n.d.            | n.d.            | n.d.                              |
|                     | SA P4 | n.d.                   | n.d. | n.d. | n.d. | n.d.            | n.d.            | n.d.                              |
|                     | SA P5 | n.d.                   | n.d. | n.d. | n.d. | n.d.            | n.d.            | n.d.                              |

<sup>a</sup> Locations: MO: Motilleja, BA: Barrax, SA: El Salobral; P: sampling point.

<sup>b</sup> DON: deoxynivalenol; ZEA: zearalenone; FB: fumonisins.  
n.d.: not detected (<LOD).

**Table S3.** Mycotoxin concentration ( $\mu\text{g/kg}$ ) of samples of corn borer-damaged non-Bt maize ears and undamaged Bt maize ears collected in Extremadura in 2012.

| Sample <sup>a</sup> |       | Mycotoxin <sup>b</sup> |      |      |      |                 |                 |                                   |
|---------------------|-------|------------------------|------|------|------|-----------------|-----------------|-----------------------------------|
|                     |       | DON                    | T-2  | HT-2 | ZEA  | FB <sub>1</sub> | FB <sub>2</sub> | FB <sub>1</sub> + FB <sub>2</sub> |
| <b>non-Bt maize</b> | VR P1 | n.d.                   | n.d. | n.d. | n.d. | n.d.            | 44              | 40                                |
|                     | VR P2 | n.d.                   | n.d. | n.d. | n.d. | 67,517          | 30,364          | 97,882                            |
|                     | VR P3 | n.d.                   | n.d. | n.d. | n.d. | 50              | 62              | 112                               |
|                     | VR P4 | n.d.                   | n.d. | n.d. | n.d. | 1,092           | 521             | 1,613                             |
|                     | VR P5 | n.d.                   | n.d. | n.d. | n.d. | 40              | n.d.            | 40                                |
|                     | OB P1 | n.d.                   | n.d. | n.d. | n.d. | 19,240          | 9,087           | 28,328                            |
|                     | OB P2 | n.d.                   | n.d. | n.d. | n.d. | 31              | n.d.            | 30                                |
|                     | OB P3 | n.d.                   | n.d. | n.d. | n.d. | 63,984          | 23,155          | 87,139                            |
|                     | OB P4 | n.d.                   | n.d. | n.d. | n.d. | 44              | 54              | 98                                |
|                     | OB P5 | n.d.                   | n.d. | n.d. | n.d. | 2,975           | 1,058           | 4,033                             |
| <b>Bt maize</b>     | VR P1 | n.d.                   | n.d. | n.d. | n.d. | n.d.            | n.d.            | n.d.                              |
|                     | VR P2 | n.d.                   | n.d. | n.d. | n.d. | n.d.            | n.d.            | n.d.                              |
|                     | VR P3 | n.d.                   | n.d. | n.d. | n.d. | n.d.            | n.d.            | n.d.                              |
|                     | VR P4 | n.d.                   | n.d. | n.d. | n.d. | 252             | 82              | 333                               |
|                     | VR P5 | n.d.                   | n.d. | n.d. | n.d. | n.d.            | n.d.            | n.d.                              |
|                     | OB P1 | n.d.                   | n.d. | n.d. | n.d. | n.d.            | n.d.            | n.d.                              |
|                     | OB P2 | n.d.                   | n.d. | n.d. | n.d. | n.d.            | n.d.            | n.d.                              |
|                     | OB P3 | n.d.                   | n.d. | n.d. | n.d. | 140             | 61              | 201                               |
|                     | OB P4 | n.d.                   | n.d. | n.d. | n.d. | 127             | n.d.            | 130                               |
|                     | OB P5 | n.d.                   | n.d. | n.d. | n.d. | n.d.            | n.d.            | n.d.                              |

<sup>a</sup> Locations: VR: Villar de Rena, OB: Obando; P: sampling point.<sup>b</sup> DON: deoxynivalenol; ZEA: zearalenone; FB: fumonisins.

n.d.: not detected (&lt;LOD).

**Table S4.** Mycotoxin concentration ( $\mu\text{g/kg}$ ) of samples of corn borer-damaged non-Bt maize ears and undamaged Bt maize ears collected in Albacete in 2012.

| Sample <sup>a</sup> |       | Mycotoxin <sup>b</sup> |      |      |      |                 |                 |                                   |
|---------------------|-------|------------------------|------|------|------|-----------------|-----------------|-----------------------------------|
|                     |       | DON                    | T-2  | HT-2 | ZEA  | FB <sub>1</sub> | FB <sub>2</sub> | FB <sub>1</sub> + FB <sub>2</sub> |
| <b>non-Bt maize</b> | GI P1 | n.d.                   | n.d. | n.d. | n.d. | 229             | 131             | 360                               |
|                     | GI P2 | n.d.                   | n.d. | n.d. | n.d. | 98              | 54              | 152                               |
|                     | GI P3 | n.d.                   | n.d. | n.d. | n.d. | 43              | n.d.            | 40                                |
|                     | GI P4 | n.d.                   | n.d. | n.d. | n.d. | 1,166           | 337             | 1,503                             |
|                     | GI P5 | n.d.                   | n.d. | n.d. | n.d. | 10,455          | 3,453           | 13,908                            |
|                     | HE P1 | n.d.                   | n.d. | n.d. | n.d. | 2,944           | 2,407           | 5,351                             |
|                     | HE P2 | n.d.                   | n.d. | n.d. | n.d. | 12,795          | 3,328           | 16,124                            |
|                     | HE P3 | n.d.                   | n.d. | n.d. | n.d. | 124             | 56              | 180                               |
|                     | HE P4 | n.d.                   | n.d. | n.d. | 56   | 1,384           | 781             | 2,165                             |
|                     | HE P5 | n.d.                   | n.d. | n.d. | n.d. | 23,802          | 10,707          | 34,509                            |
| <b>Bt maize</b>     | GI P1 | n.d.                   | n.d. | n.d. | n.d. | 40              | n.d.            | 40                                |
|                     | GI P2 | n.d.                   | n.d. | n.d. | n.d. | n.d.            | n.d.            | n.d.                              |
|                     | GI P3 | n.d.                   | n.d. | n.d. | n.d. | 63              | 48              | 111                               |
|                     | GI P4 | n.d.                   | n.d. | n.d. | n.d. | n.d.            | n.d.            | n.d.                              |
|                     | GI P5 | n.d.                   | n.d. | n.d. | n.d. | 165             | n.d.            | 170                               |
|                     | HE P1 | n.d.                   | n.d. | n.d. | n.d. | n.d.            | n.d.            | n.d.                              |
|                     | HE P2 | n.d.                   | n.d. | n.d. | n.d. | n.d.            | n.d.            | n.d.                              |
|                     | HE P3 | n.d.                   | n.d. | n.d. | n.d. | n.d.            | n.d.            | n.d.                              |
|                     | HE P4 | n.d.                   | n.d. | n.d. | n.d. | n.d.            | n.d.            | n.d.                              |
|                     | HE P5 | n.d.                   | n.d. | n.d. | n.d. | n.d.            | n.d.            | n.d.                              |

<sup>a</sup> Locations: GI: La Gineta, HE: La Herrera; P: sampling point<sup>b</sup> DON: deoxynivalenol; ZEA: zearalenone; FB: fumonisins

n.d.: not detected (&lt;LOD).

**Table S5.** Mycotoxin concentration ( $\mu\text{g/kg}$ ) of samples of corn borer-damaged non-Bt maize ears and undamaged Bt maize ears collected in Ebro Valley in 2012.

| Sample <sup>a</sup> |       | Mycotoxin <sup>b</sup> |      |      |      |                 |                 |                                   |
|---------------------|-------|------------------------|------|------|------|-----------------|-----------------|-----------------------------------|
|                     |       | DON                    | T-2  | HT-2 | ZEA  | FB <sub>1</sub> | FB <sub>2</sub> | FB <sub>1</sub> + FB <sub>2</sub> |
| <b>non-Bt maize</b> | EJ P1 | <b>141</b>             | n.d. | n.d. | n.d. | <b>15</b>       | n.d.            | <b>15</b>                         |
|                     | EJ P2 | <b>1,905</b>           | n.d. | n.d. | n.d. | n.d.            | n.d.            | n.d.                              |
|                     | EJ P3 | <b>9,537</b>           | n.d. | n.d. | n.d. | n.d.            | n.d.            | n.d.                              |
|                     | EJ P4 | <b>1,701</b>           | n.d. | n.d. | n.d. | <b>1,830</b>    | <b>1,320</b>    | <b>3,150</b>                      |
|                     | EJ P5 | n.d.                   | n.d. | n.d. | n.d. | <b>500</b>      | <b>750</b>      | <b>1,250</b>                      |
|                     | CA P1 | n.d.                   | n.d. | n.d. | n.d. | n.d.            | n.d.            | n.d.                              |
|                     | CA P2 | n.d.                   | n.d. | n.d. | n.d. | n.d.            | n.d.            | n.d.                              |
|                     | CA P3 | n.d.                   | n.d. | n.d. | n.d. | n.d.            | n.d.            | n.d.                              |
|                     | CA P4 | n.d.                   | n.d. | n.d. | n.d. | n.d.            | n.d.            | n.d.                              |
|                     | CA P5 | n.d.                   | n.d. | n.d. | n.d. | n.d.            | n.d.            | n.d.                              |
|                     | UR P1 | n.d.                   | n.d. | n.d. | n.d. | n.d.            | n.d.            | n.d.                              |
|                     | UR P2 | n.d.                   | n.d. | n.d. | n.d. | n.d.            | n.d.            | n.d.                              |
|                     | UR P3 | n.d.                   | n.d. | n.d. | n.d. | <b>990</b>      | <b>140</b>      | <b>1,130</b>                      |
|                     | UR P4 | n.d.                   | n.d. | n.d. | n.d. | <b>4,040</b>    | <b>430</b>      | <b>4,470</b>                      |
|                     | UR P5 | n.d.                   | n.d. | n.d. | n.d. | <b>2,830</b>    | <b>600</b>      | <b>3,430</b>                      |
|                     | LU P1 | n.d.                   | n.d. | n.d. | n.d. | <b>510</b>      | <b>110</b>      | <b>620</b>                        |
|                     | LU P2 | n.d.                   | n.d. | n.d. | n.d. | <b>5,110</b>    | <b>1,230</b>    | <b>6,340</b>                      |
|                     | LU P3 | n.d.                   | n.d. | n.d. | n.d. | <b>57,890</b>   | <b>12,840</b>   | <b>70,730</b>                     |
|                     | LU P4 | n.d.                   | n.d. | n.d. | n.d. | <b>60</b>       | n.d.            | <b>60</b>                         |
|                     | LU P5 | n.d.                   | n.d. | n.d. | n.d. | n.d.            | n.d.            | n.d.                              |
| <b>Bt maize</b>     | EJ P1 | n.d.                   | n.d. | n.d. | n.d. | n.d.            | n.d.            | n.d.                              |
|                     | EJ P2 | n.d.                   | n.d. | n.d. | n.d. | <b>17</b>       | n.d.            | <b>17</b>                         |
|                     | EJ P3 | n.d.                   | n.d. | n.d. | n.d. | n.d.            | n.d.            | n.d.                              |
|                     | EJ P4 | n.d.                   | n.d. | n.d. | n.d. | n.d.            | n.d.            | n.d.                              |
|                     | EJ P5 | n.d.                   | n.d. | n.d. | n.d. | n.d.            | n.d.            | n.d.                              |
|                     | CA P1 | <b>69</b>              | n.d. | n.d. | n.d. | <b>50</b>       | n.d.            | <b>50</b>                         |
|                     | CA P2 | <b>421</b>             | n.d. | n.d. | n.d. | n.d.            | n.d.            | n.d.                              |
|                     | CA P3 | n.d.                   | n.d. | n.d. | n.d. | n.d.            | n.d.            | n.d.                              |
|                     | CA P4 | <b>860</b>             | n.d. | n.d. | n.d. | n.d.            | n.d.            | n.d.                              |
|                     | CA P5 | <b>44</b>              | n.d. | n.d. | n.d. | n.d.            | n.d.            | n.d.                              |
|                     | UR P1 | n.d.                   | n.d. | n.d. | n.d. | n.d.            | n.d.            | n.d.                              |
|                     | UR P2 | n.d.                   | n.d. | n.d. | n.d. | n.d.            | n.d.            | n.d.                              |
|                     | UR P3 | n.d.                   | n.d. | n.d. | n.d. | n.d.            | n.d.            | n.d.                              |
|                     | UR P4 | n.d.                   | n.d. | n.d. | n.d. | n.d.            | n.d.            | n.d.                              |
|                     | UR P5 | n.d.                   | n.d. | n.d. | n.d. | n.d.            | n.d.            | n.d.                              |
|                     | LU P1 | n.d.                   | n.d. | n.d. | n.d. | n.d.            | n.d.            | n.d.                              |
|                     | LU P2 | n.d.                   | n.d. | n.d. | n.d. | n.d.            | n.d.            | n.d.                              |
|                     | LU P3 | n.d.                   | n.d. | n.d. | n.d. | n.d.            | n.d.            | n.d.                              |
|                     | LU P4 | n.d.                   | n.d. | n.d. | n.d. | n.d.            | n.d.            | n.d.                              |
|                     | LU P5 | n.d.                   | n.d. | n.d. | n.d. | n.d.            | n.d.            | n.d.                              |

<sup>a</sup> Locations: EJ: Ejea de los Caballeros, CA: Candasnos, UR: Urrea de Jalón, LU: Lucena de Jalón; P: sampling point.<sup>b</sup> DON: deoxynivalenol; ZEA: zearalenone; FB: fumonisins.

n.d.: &lt;LOD.

**Table S6.** Mycotoxin concentration ( $\mu\text{g/kg}$ ) of samples of corn borer-damaged non-Bt maize ears and undamaged Bt maize ears collected in Ebro Valley in 2013.

| Sample <sup>a</sup> |       | Mycotoxin <sup>b</sup> |      |      |      |                 |                 |                                   |
|---------------------|-------|------------------------|------|------|------|-----------------|-----------------|-----------------------------------|
|                     |       | DON                    | T-2  | HT-2 | ZEA  | FB <sub>1</sub> | FB <sub>2</sub> | FB <sub>1</sub> + FB <sub>2</sub> |
| <b>non-Bt maize</b> | AM P1 | n.d.                   | n.d. | n.d. | n.d. | n.d.            | n.d.            | n.d.                              |
|                     | AM P2 | n.d.                   | n.d. | n.d. | n.d. | n.d.            | n.d.            | n.d.                              |
|                     | AM P3 | n.d.                   | n.d. | n.d. | n.d. | 130             | 150             | 280                               |
|                     | AM P4 | n.d.                   | n.d. | n.d. | n.d. | 2,570           | 1,300           | 3,870                             |
|                     | AM P5 | n.d.                   | n.d. | n.d. | n.d. | 290             | 130             | 420                               |
|                     | CA P1 | n.d.                   | n.d. | n.d. | n.d. | n.d.            | n.d.            | n.d.                              |
|                     | CA P2 | n.d.                   | n.d. | n.d. | 11   | 2,330           | n.d.            | 2,330                             |
|                     | CA P3 | 64                     | n.d. | n.d. | 12   | n.d.            | n.d.            | n.d.                              |
|                     | CA P4 | 97                     | n.d. | n.d. | 13   | 11,840          | 2,440           | 14,280                            |
|                     | CA P5 | n.d.                   | n.d. | n.d. | 12   | 140             | 30              | 170                               |
|                     | RB P1 | n.d.                   | n.d. | n.d. | n.d. | 8,550           | 2,620           | 11,170                            |
|                     | RB P2 | n.d.                   | n.d. | n.d. | n.d. | 28,290          | 11,720          | 40,010                            |
|                     | RB P3 | n.d.                   | n.d. | n.d. | n.d. | 910             | 200             | 1,110                             |
|                     | RB P4 | n.d.                   | n.d. | n.d. | n.d. | 6,520           | 2,010           | 8,530                             |
|                     | RB P5 | n.d.                   | n.d. | n.d. | 11   | 2,660           | 1,280           | 3,940                             |
|                     | TA P1 | n.d.                   | n.d. | n.d. | n.d. | 330             | 140             | 470                               |
|                     | TA P2 | 494                    | n.d. | n.d. | 223  | 280             | 170             | 450                               |
|                     | TA P3 | n.d.                   | n.d. | n.d. | n.d. | 250             | 150             | 400                               |
|                     | TA P4 | 884                    | n.d. | n.d. | 25   | n.d.            | n.d.            | n.d.                              |
|                     | TA P5 | n.d.                   | n.d. | n.d. | 1    | n.d.            | n.d.            | n.d.                              |
| <b>Bt maize</b>     | AM P1 | n.d.                   | n.d. | n.d. | n.d. | 120             | n.d.            | 120                               |
|                     | AM P2 | n.d.                   | n.d. | n.d. | n.d. | n.d.            | n.d.            | n.d.                              |
|                     | AM P3 | n.d.                   | n.d. | n.d. | n.d. | n.d.            | n.d.            | n.d.                              |
|                     | AM P4 | n.d.                   | n.d. | n.d. | n.d. | n.d.            | n.d.            | n.d.                              |
|                     | CA P1 | n.d.                   | n.d. | n.d. | n.d. | n.d.            | n.d.            | n.d.                              |
|                     | CA P2 | n.d.                   | n.d. | n.d. | n.d. | n.d.            | n.d.            | n.d.                              |
|                     | CA P3 | n.d.                   | n.d. | n.d. | n.d. | n.d.            | n.d.            | n.d.                              |
|                     | CA P4 | n.d.                   | n.d. | n.d. | n.d. | 20              | n.d.            | 20                                |
|                     | CA P5 | n.d.                   | n.d. | n.d. | n.d. | n.d.            | n.d.            | n.d.                              |
|                     | RB P1 | n.d.                   | n.d. | n.d. | n.d. | 6,910           | 3,880           | 10,790                            |
|                     | RB P2 | n.d.                   | n.d. | n.d. | n.d. | n.d.            | n.d.            | n.d.                              |
|                     | RB P3 | n.d.                   | n.d. | n.d. | n.d. | n.d.            | n.d.            | n.d.                              |
|                     | RB P4 | n.d.                   | n.d. | n.d. | n.d. | n.d.            | n.d.            | n.d.                              |
|                     | RL P5 | n.d.                   | n.d. | n.d. | n.d. | 170             | 140             | 310                               |
|                     | TA P1 | n.d.                   | n.d. | n.d. | 13   | n.d.            | n.d.            | n.d.                              |
|                     | TA P2 | 58                     | n.d. | n.d. | n.d. | n.d.            | n.d.            | n.d.                              |
|                     | TA P3 | n.d.                   | n.d. | n.d. | n.d. | 290             | n.d.            | 290                               |
|                     | TA P4 | n.d.                   | n.d. | n.d. | n.d. | 340             | n.d.            | 340                               |
|                     | TA P5 | n.d.                   | n.d. | n.d. | n.d. | n.d.            | n.d.            | n.d.                              |

<sup>a</sup> Locations: AM: Almedávar, CA: Candasnos, RB: Ribafiorada, TA: Tafalla; P: sampling point.<sup>b</sup> DON: deoxynivalenol; ZEA: zearalenone; FB: fumonisins.

n.d.: not detected (&lt;LOD).

**Table S7.** Characteristics of maize hybrids evaluated for contamination by *Fusarium* species and mycotoxin contamination.

| Area        | Year | Location (province) <sup>a</sup> | Samples dates | Maize      |                 |              |
|-------------|------|----------------------------------|---------------|------------|-----------------|--------------|
|             |      |                                  |               | Maize type | Variety (cycle) | Sowing dates |
| Extremadura | 2011 | Riolobos (CC)                    | 15-sep        | non-Bt     | DKC6666 (700)   | 15-may       |
|             |      |                                  |               | Bt         | DKC6667YG (700) |              |
|             |      | Don Benito (BA)                  | 15-sep        | non-Bt     | PR33Y74 (600)   | 29-mar       |
|             |      |                                  |               | Bt         | PR33Y72 (600)   |              |
|             |      | Madrigalejo (CC)                 | 15-sep        | non-Bt     | PR33Y74 (600)   | 20-abr       |
|             |      |                                  |               | Bt         | PR33Y72 (600)   |              |
|             |      | Moheda de Gata (CC)              | 16-sep        | non-Bt     | P1758 (700)     | 12-may       |
|             |      |                                  |               | Bt         | DKC6667YG (700) |              |
|             | 2012 | Navalvillar de Pela (BA)         | 18-sep        | non-Bt     | DKC6666 (700)   | 13-abr       |
|             |      |                                  |               | Bt         | DKC6667YG (700) |              |
|             |      | Villar de Rena (BA)              | 19-sep        | non-Bt     | PR31D58 (700)   | 08-may       |
|             |      |                                  |               | Bt         | PR33D48 (700)   |              |
|             |      | Obando (BA)                      | 19-sep        | non-Bt     | PR31D58 (700)   | 20-abr       |
|             |      |                                  |               | Bt         | PR33D48 (700)   |              |
| Albacete    | 2011 | Motilleja (AB)                   | 04-oct        | non-Bt     | PR34N43 (500)   | 15-abr       |
|             |      |                                  |               | Bt         | PR31N28 (700)   |              |
|             |      | Barrax (AB)                      | 04-oct        | non-Bt     | DKC6721 (700)   | 07-abr       |
|             |      |                                  |               | Bt         | DKC6667YG (700) |              |
|             |      | El Salobral (AB)                 | 05-oct        | non-Bt     | DKC6721 (700)   | 06-abr       |
|             |      |                                  |               | Bt         | DKC6667YG (700) |              |
|             | 2012 | La Gineta (AB)                   | 02-oct        | non-Bt     | DKC6450 (700)   | 18-abr       |
|             |      |                                  |               | Bt         | DKC6451YG (700) |              |
|             |      | Santa Ana (AB)                   | 02-oct        | non-Bt     | DKC6450 (700)   | 20-abr       |
|             |      |                                  |               | Bt         | DKC6451YG (700) |              |
|             |      | La Herrera (AB)                  | 03-oct        | non-Bt     | -               | 09-abr       |
|             |      |                                  |               | Bt         | PR34N44 (600)   |              |
|             |      | Motilleja (AB)                   | 03-oct        | non-Bt     | Helen (700)     | 05-abr       |
|             |      |                                  |               | Bt         | Helen Bt (700)  |              |
| Ebro Valley | 2012 | Ejea de los Caballeros (HU)      | 16-oct        | non-Bt     | DKC6677 (600)   | 13-abr       |
|             |      |                                  |               | Bt         | DKC6678YG (600) |              |
|             |      | Candasnos (HU)                   | 16-oct        | non-Bt     | DKC6717 (700)   | 25-abr       |
|             |      |                                  |               | Bt         | DCK5277YG (400) |              |
|             |      | Urrea de Jalón (Z)               | 17-oct        | non-Bt     | DKC6717 (700)   | 09-abr       |
|             |      |                                  |               | Bt         | -               |              |
|             |      | Lucena de Jalón (Z)              | 17-oct        | non-Bt     | DKC6717 (700)   | 11-abr       |
|             |      |                                  |               | Bt         | DKC6667YG (700) |              |
|             | 2013 | Almudevar (HU)                   | 15-oct        | non-Bt     | DKC6450 (700)   | 22-abr       |
|             |      |                                  |               | Bt         | DKC6451YG (700) |              |
|             |      | Candasnos (HU)                   | 15-oct        | non-Bt     | DKC6717 (700)   | 15-abr       |
|             |      |                                  |               | Bt         | DKC6667YG (700) |              |
|             |      | Ribaforada (NA)                  | 16-oct        | non-Bt     | DKC6630 (700)   | 06-abr       |
|             |      |                                  |               | Bt         | DKC6451YG (700) |              |
|             |      | Tafalla (NA)                     | 16-oct        | non-Bt     | DKC5401 (500)   | 20-abr       |
|             |      |                                  |               | Bt         | PR33W86 (600)   |              |

<sup>a</sup> Cáceres (CC), Badajoz (BA), Albacete (AB), Zaragoza (Z), Huesca (HU) and Navarra (NA).

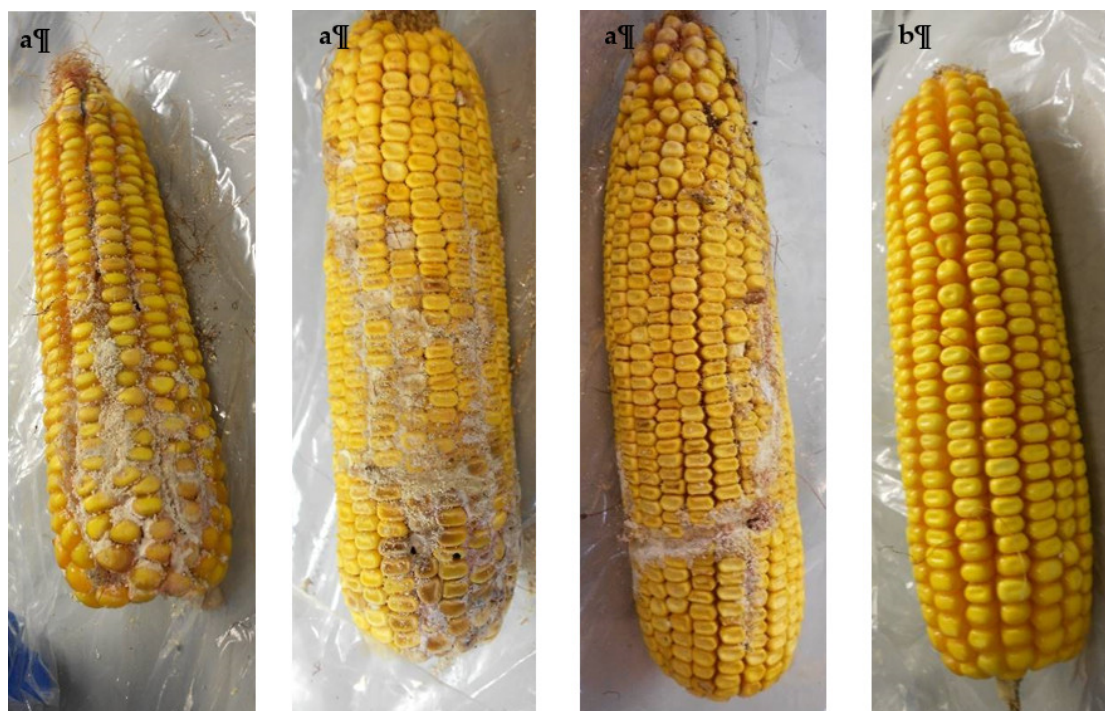

**Figure S1.** Corn borer-damaged maize ears collected in non-Bt maize fields (a) and undamaged ear from a Bt maize field (b).
